# Supplementary material
Source: PubMed Central journal article supplement (PMC2924093)

Supplemental Figure S1

**PC-3**

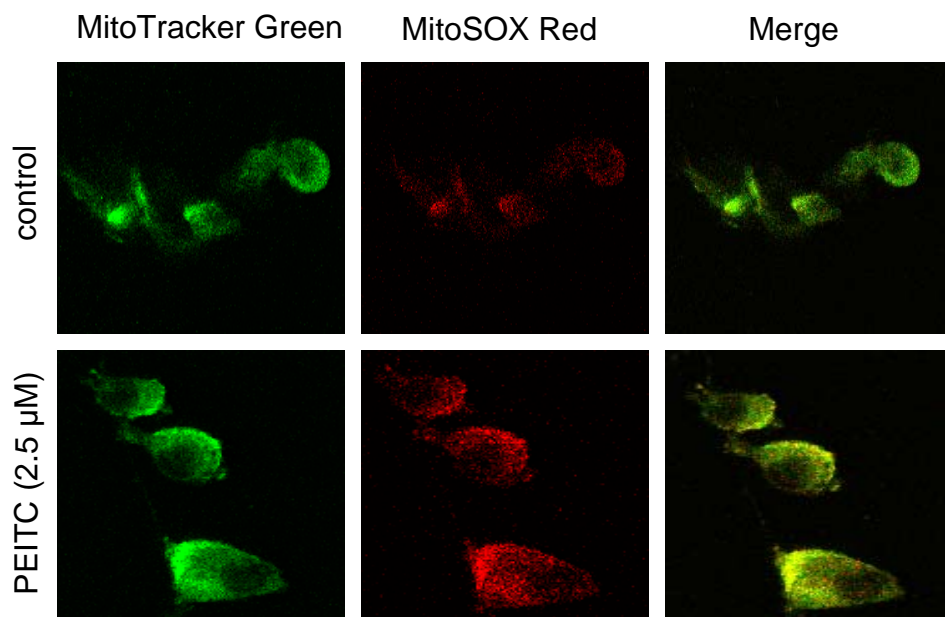

Supplemental Figure S2

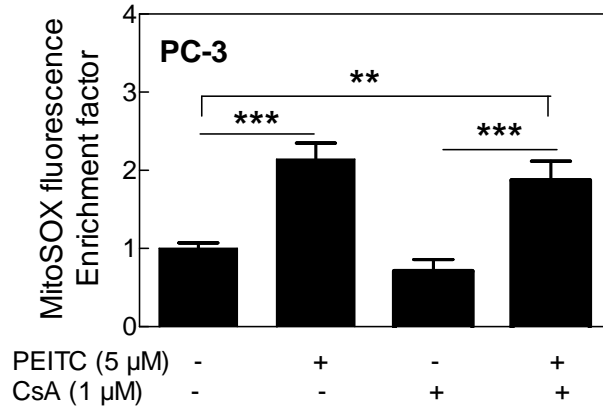

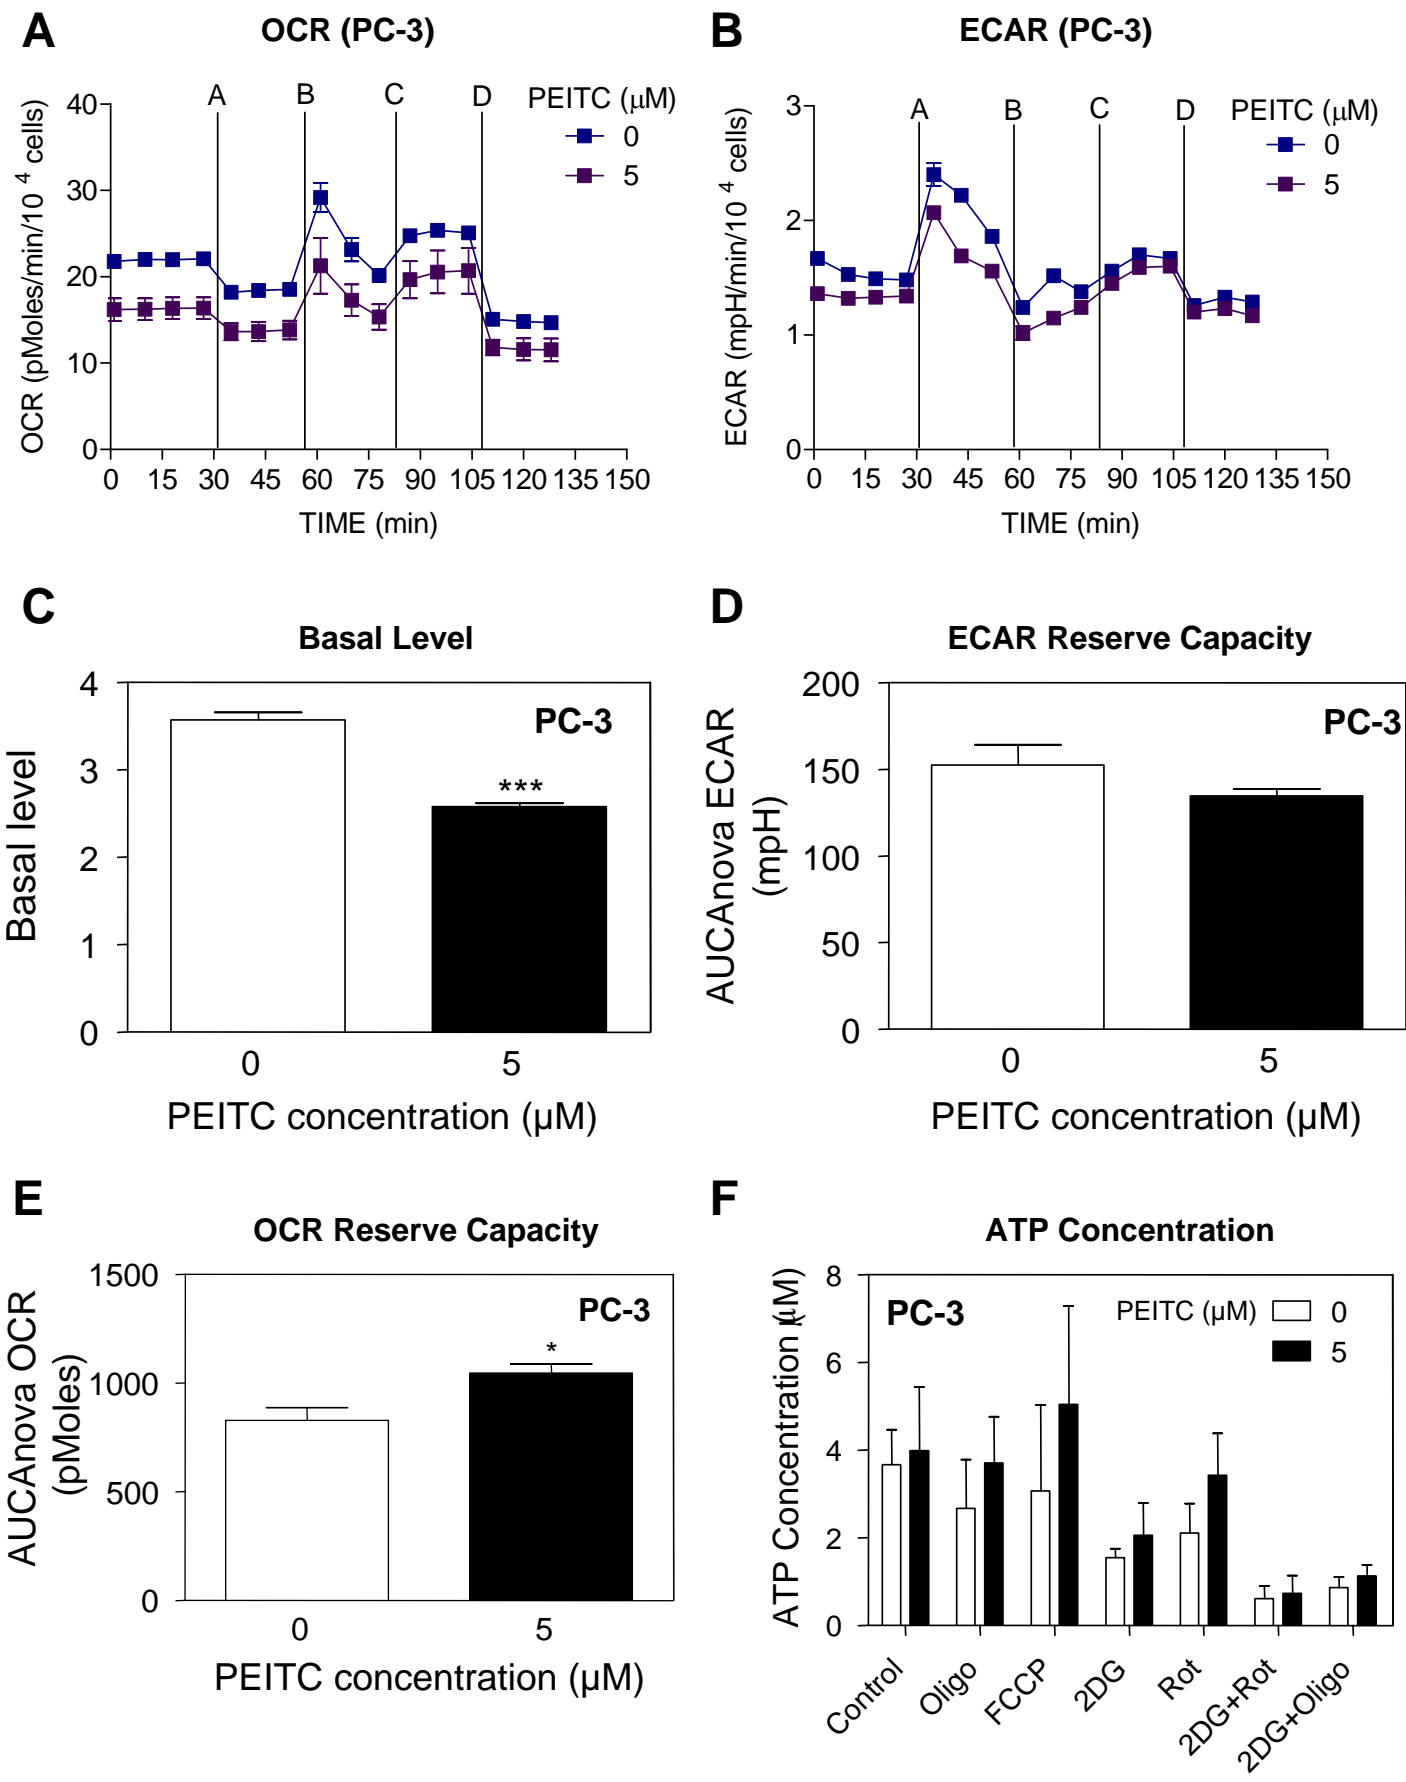

Supplement: supp_M109.063255_jbc.M109.063255-1.pdf [file supp_M109.063255_jbc.M109.063255-1.pdf]
